# Supplementary material for: Hydrogen-bonded supramolecular micelle-mediated drug delivery enhances the efficacy and safety of cancer chemotherapy
Source: Royal Society of Chemistry journal article supplement (doi:10.1039/d0py00082e), 2020-01-01
Supplement: d0py00082e1.pdf [file d0py00082e1.pdf]

## Supporting Information

### ***Hydrogen-Bonded Supramolecular Micelle-Mediated Drug Delivery Enhances the Efficacy and Safety of Cancer Chemotherapy***

*Chih-Chia Cheng,<sup>a,b\*</sup> Ya-Ting Sun,<sup>a</sup> Ai-Wei Lee,<sup>f,g,h</sup> Shan-You Huang,<sup>a</sup> Wen-Lu Fan,<sup>a</sup> Yu-Hsuan Chiao,<sup>i</sup> Chih-Wei Chiu,<sup>d</sup> and Juin-Yih Lai<sup>a,b,c,e</sup>*

- a. Graduate Institute of Applied Science and Technology, National Taiwan University of Science and Technology, Taipei 10607, Taiwan. E-mail: [cccheng@mail.ntust.edu.tw](mailto:cccheng@mail.ntust.edu.tw)
- b. Advanced Membrane Materials Research Center, National Taiwan University of Science and Technology, Taipei 10607, Taiwan.
- c. Department of Chemical Engineering, National Taiwan University of Science and Technology, Taipei 10607, Taiwan.
- d. Department of Materials Science and Engineering, National Taiwan University of Science and Technology, Taipei 10607, Taiwan.
- e. R&D Center for Membrane Technology, Chung Yuan Christian University, Chungli, Taoyuan 32043, Taiwan.
- f. Department of Anatomy and Cell Biology, School of Medicine, College of Medicine, Taipei Medical University, Taipei 11031, Taiwan.
- g. Cardiovascular Research Center, Taipei Medical University Hospital, Taipei, 11031, Taiwan.
- h. Taipei Heart Institute, Taipei Medical University, Taipei, 11031, Taiwan.
- i. Department of Chemical Engineering, University of Arkansas, Fayetteville, AR 72701, United States.

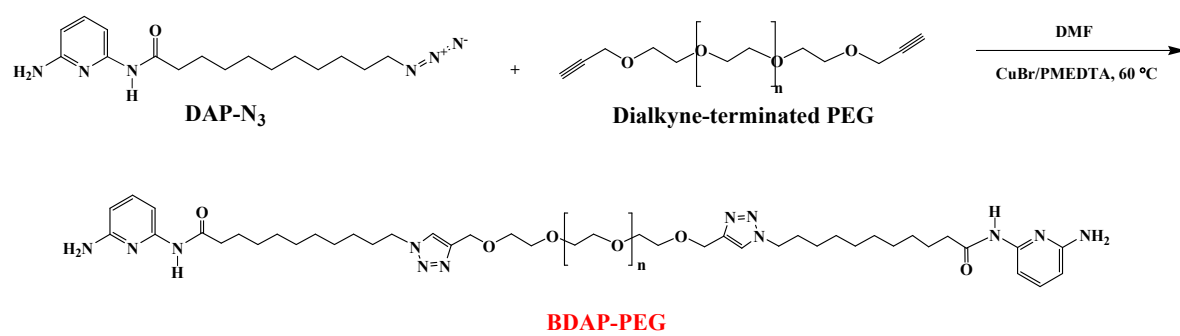

**Scheme S1:** Synthetic routes for BDAP-PEG.

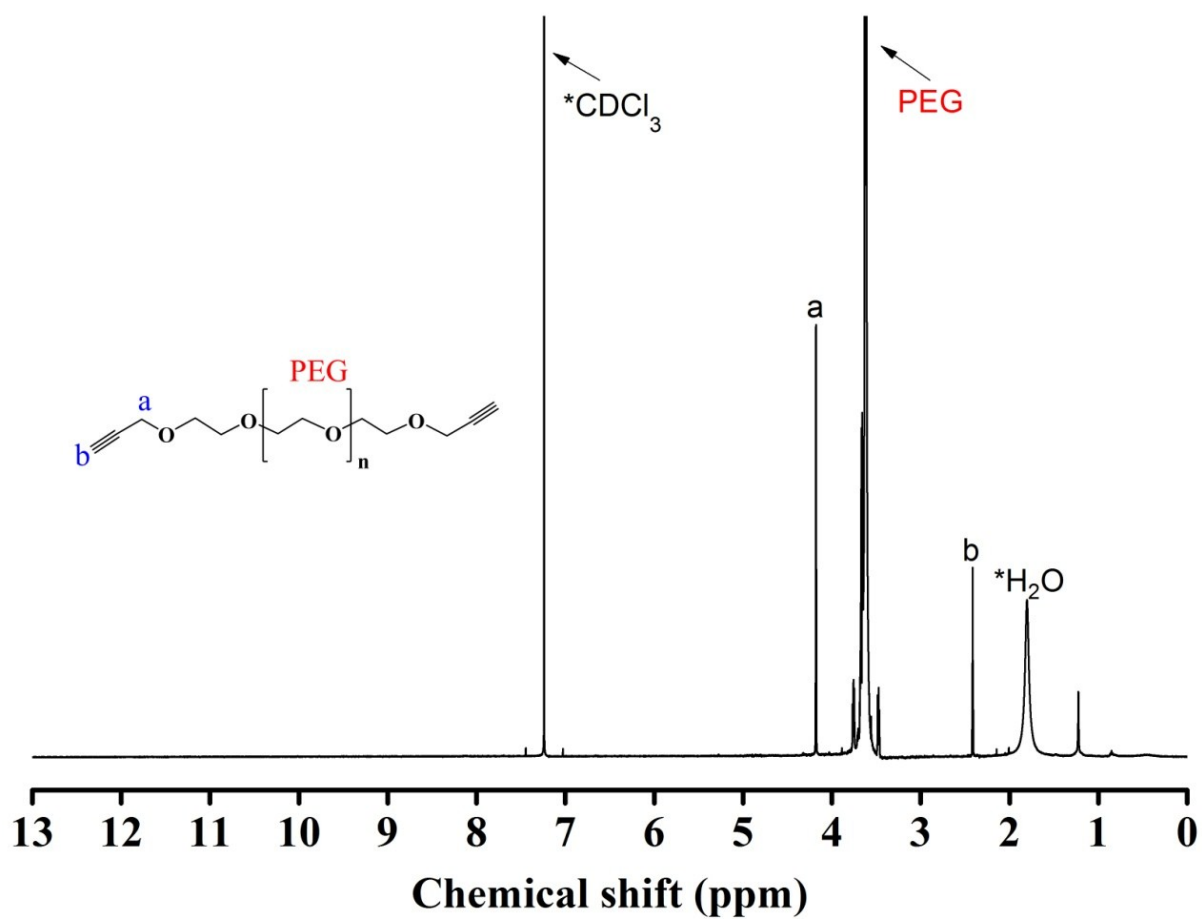

**Fig. S1:** 500 MHz  $^1\text{H}$  NMR spectrum of dipropargyl PEG in deuterated chloroform ( $\text{CDCl}_3$ ) at 25  $^\circ\text{C}$ .

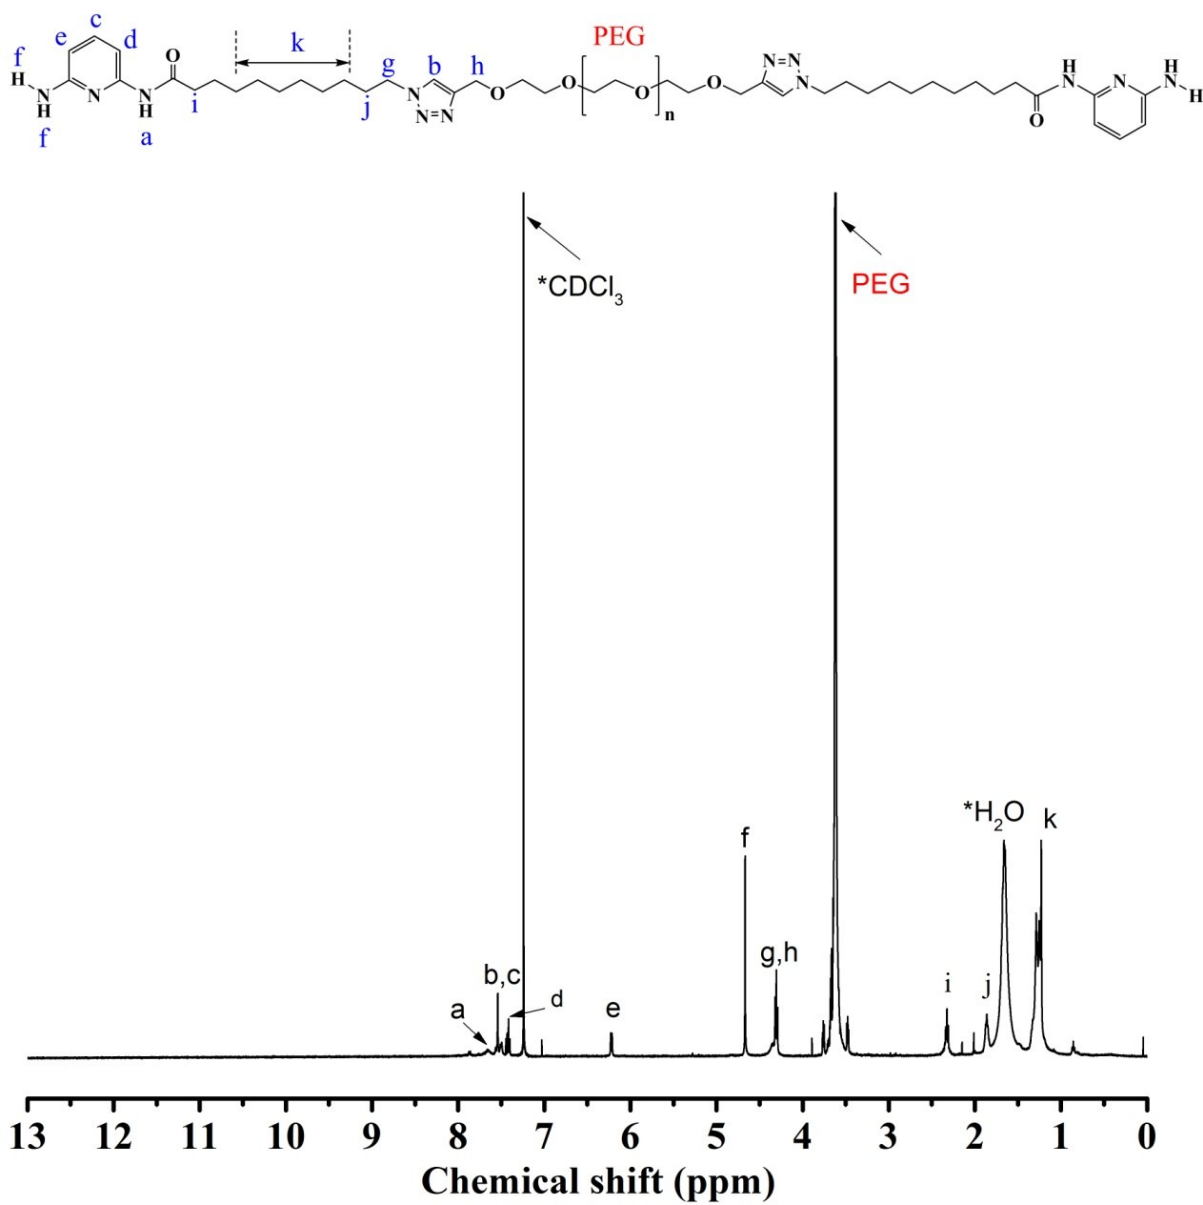

**Fig. S2:** 500 MHz  $^1\text{H}$  NMR spectrum of BDAP-PEG in  $\text{CDCl}_3$  at 25 °C.

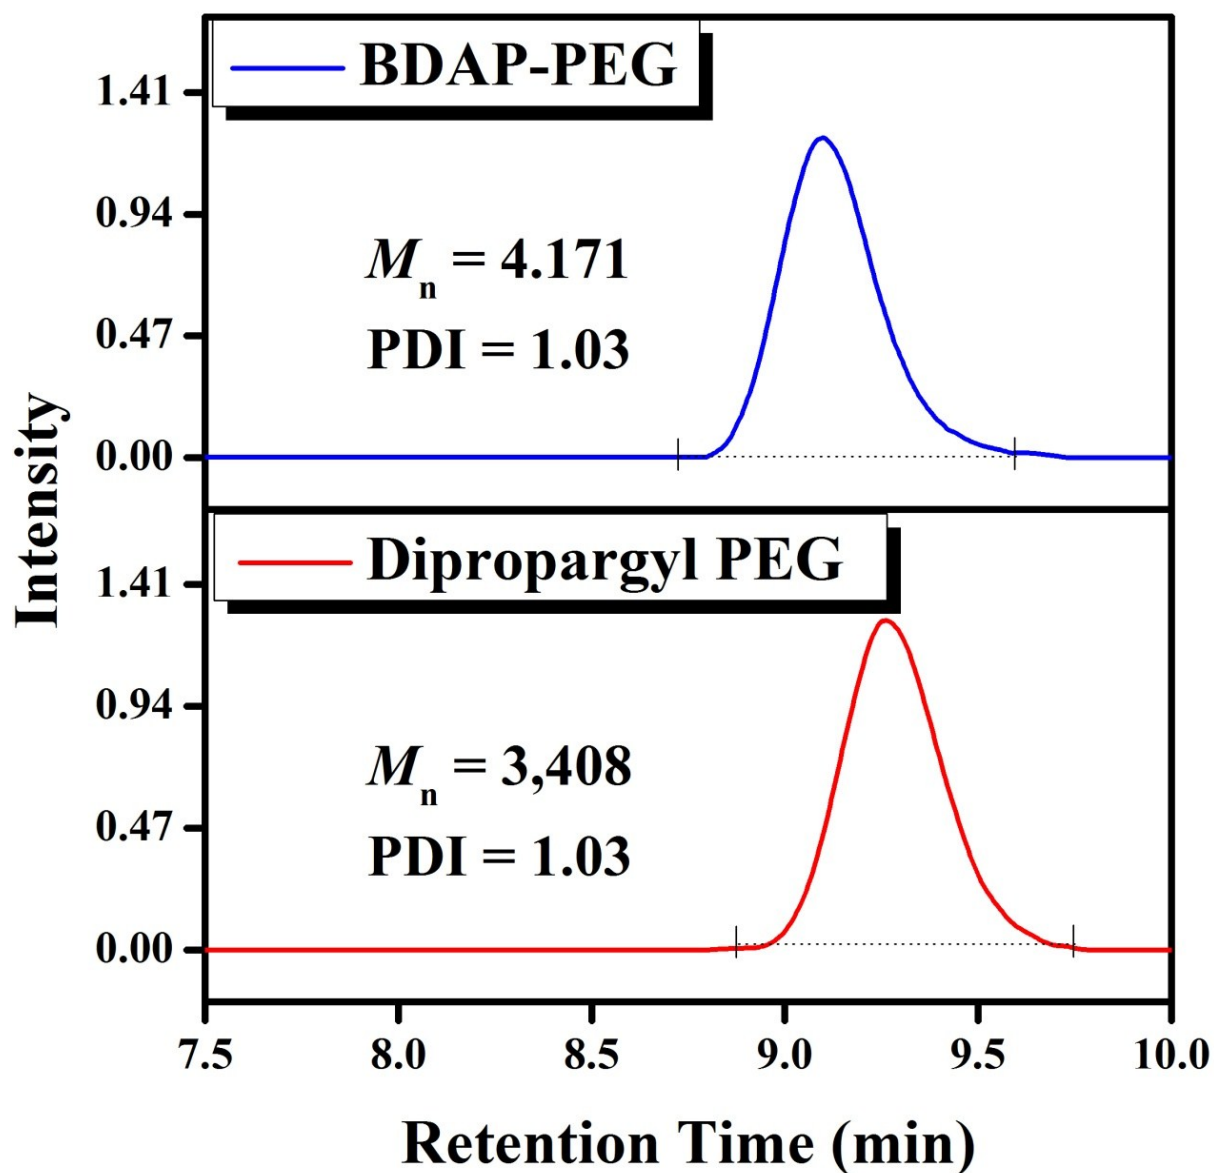

Fig. S3: GPC traces of dipropargyl PEG and BDAP-PEG with DMF eluent at 50 °C.

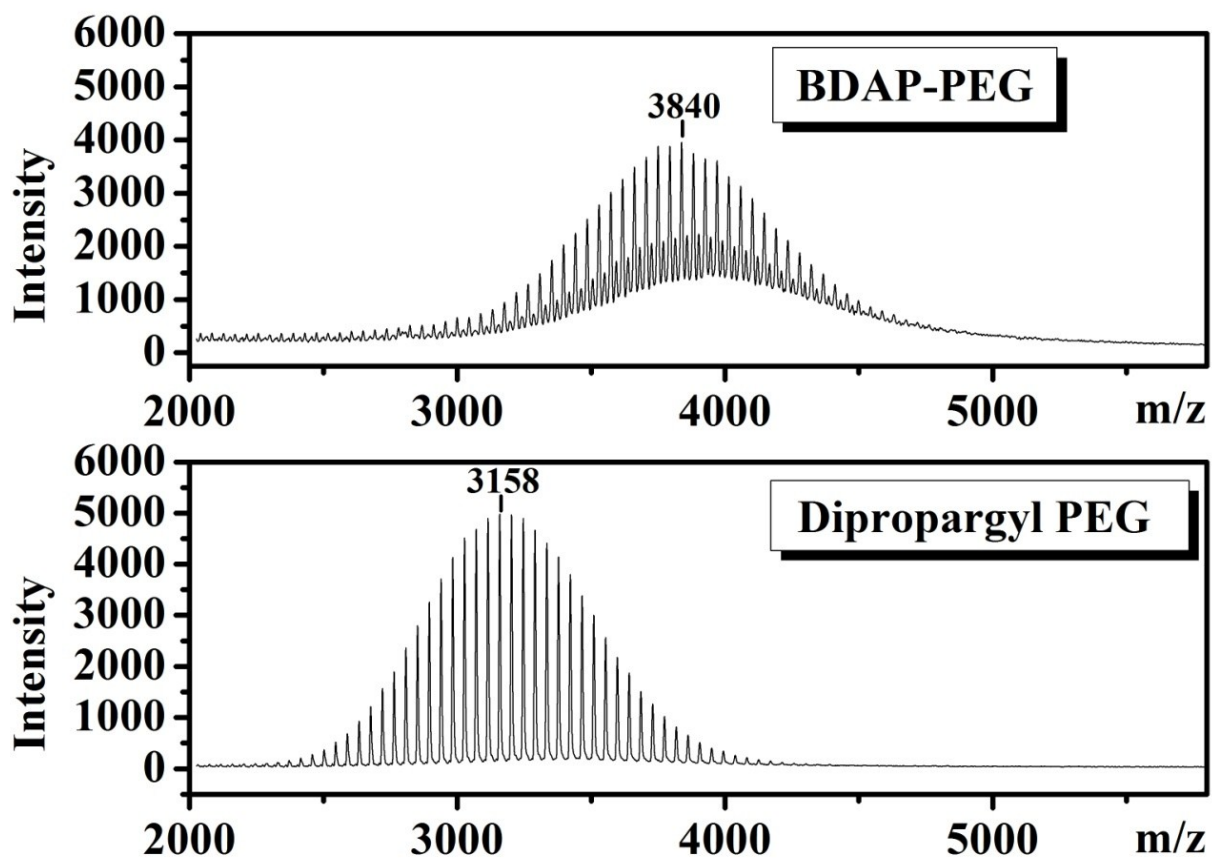

Fig. S4: MALDI-TOF mass spectra of dipropargyl PEG and BDAP-PEG.

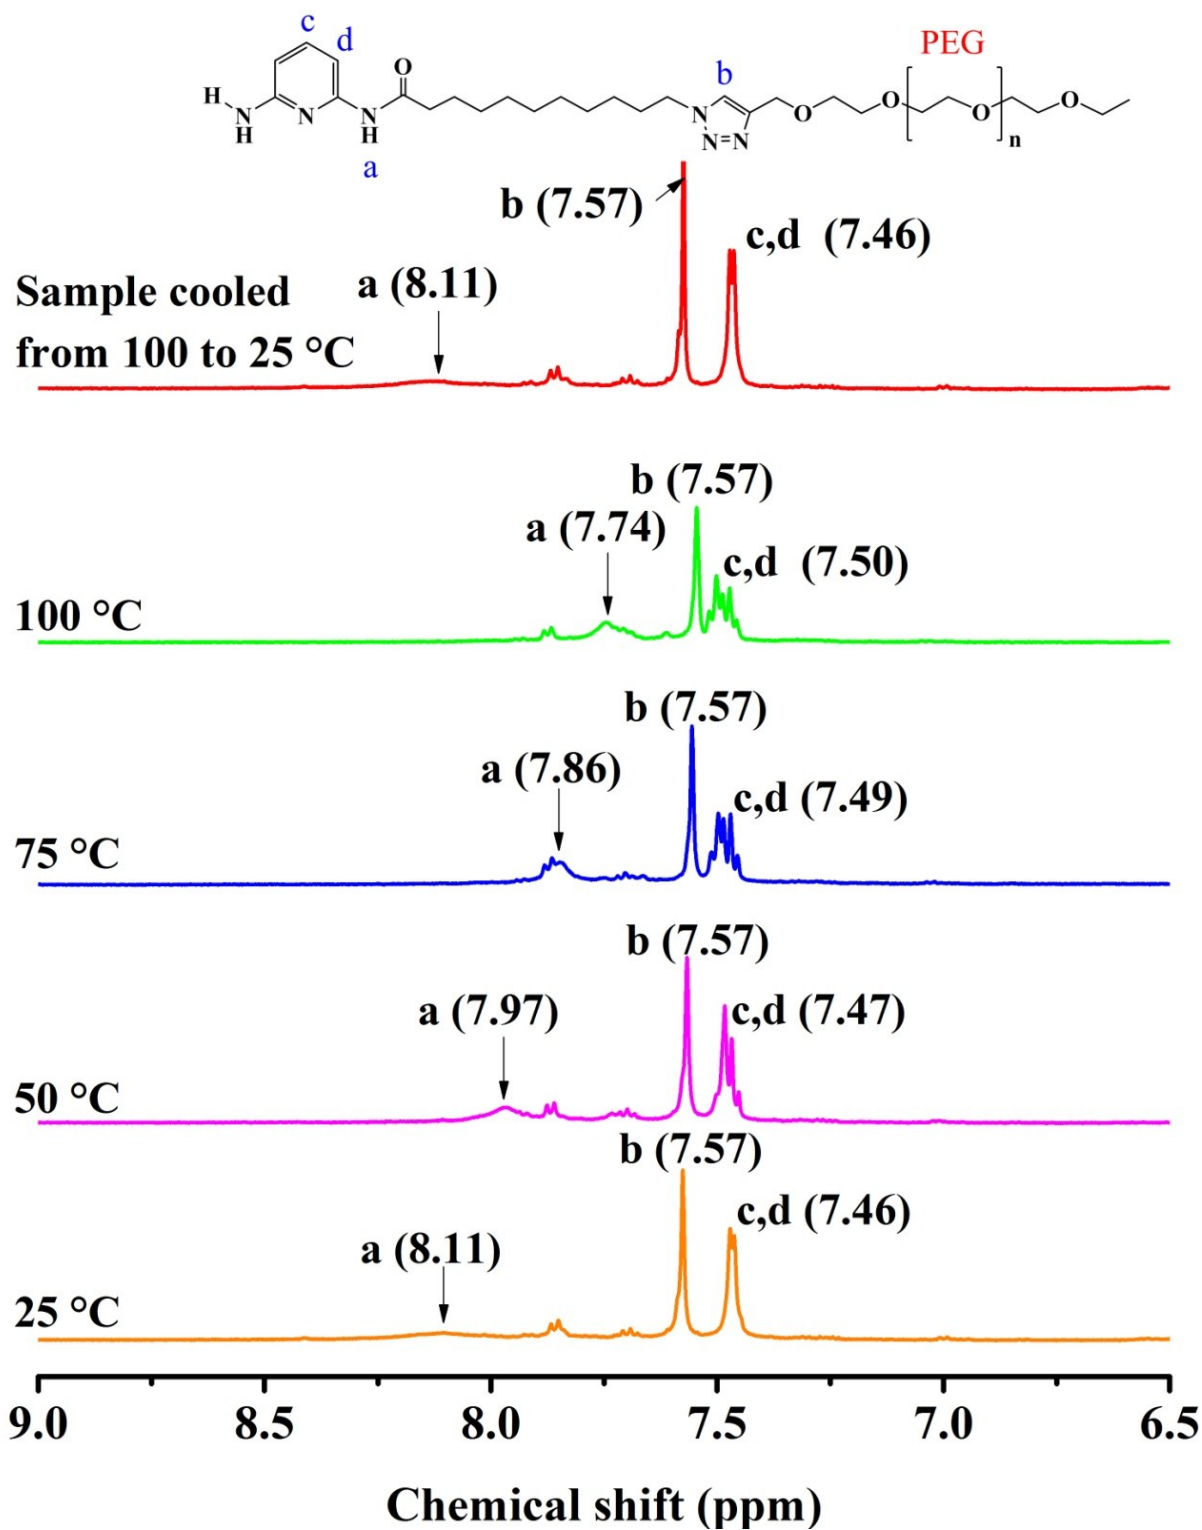

Fig. S5: 500 MHz  $^1\text{H}$  NMR spectra for BDAP-PEG in 1,1,2,2-tetrachloroethane- $d_2$  at various temperatures.

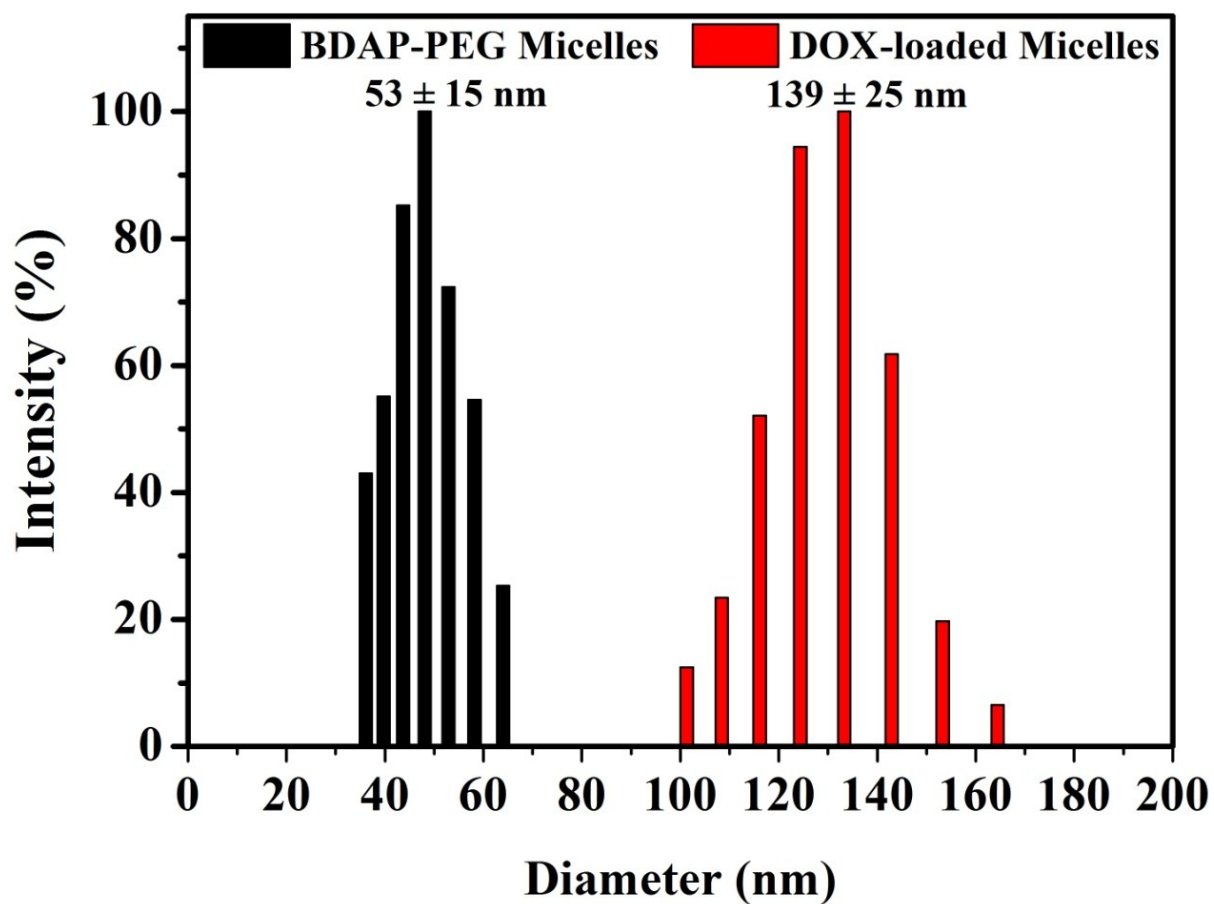

**Fig. S6:** Particle size distribution of blank and DOX-loaded BDAP-PEG micelles (DLC =  $17.60 \pm 1.5\%$ ) in water at 25 °C.

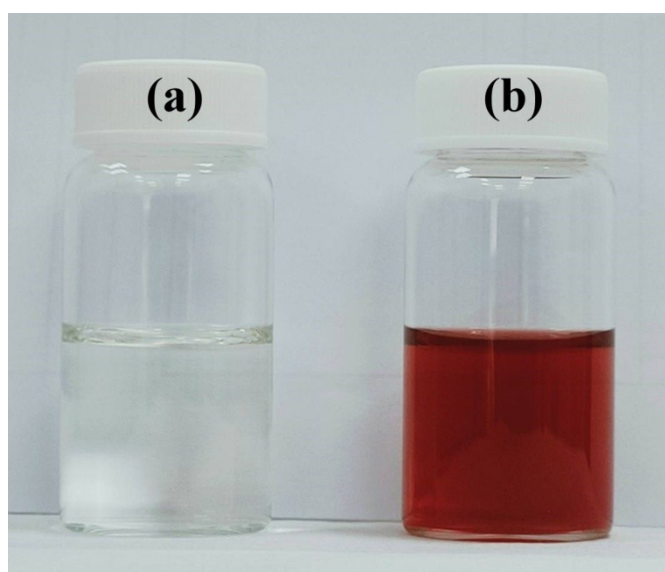

**Figure S7:** Digital photos for (a) blank and (b) DOX-loaded BDAP-PEG micelles in aqueous solution.



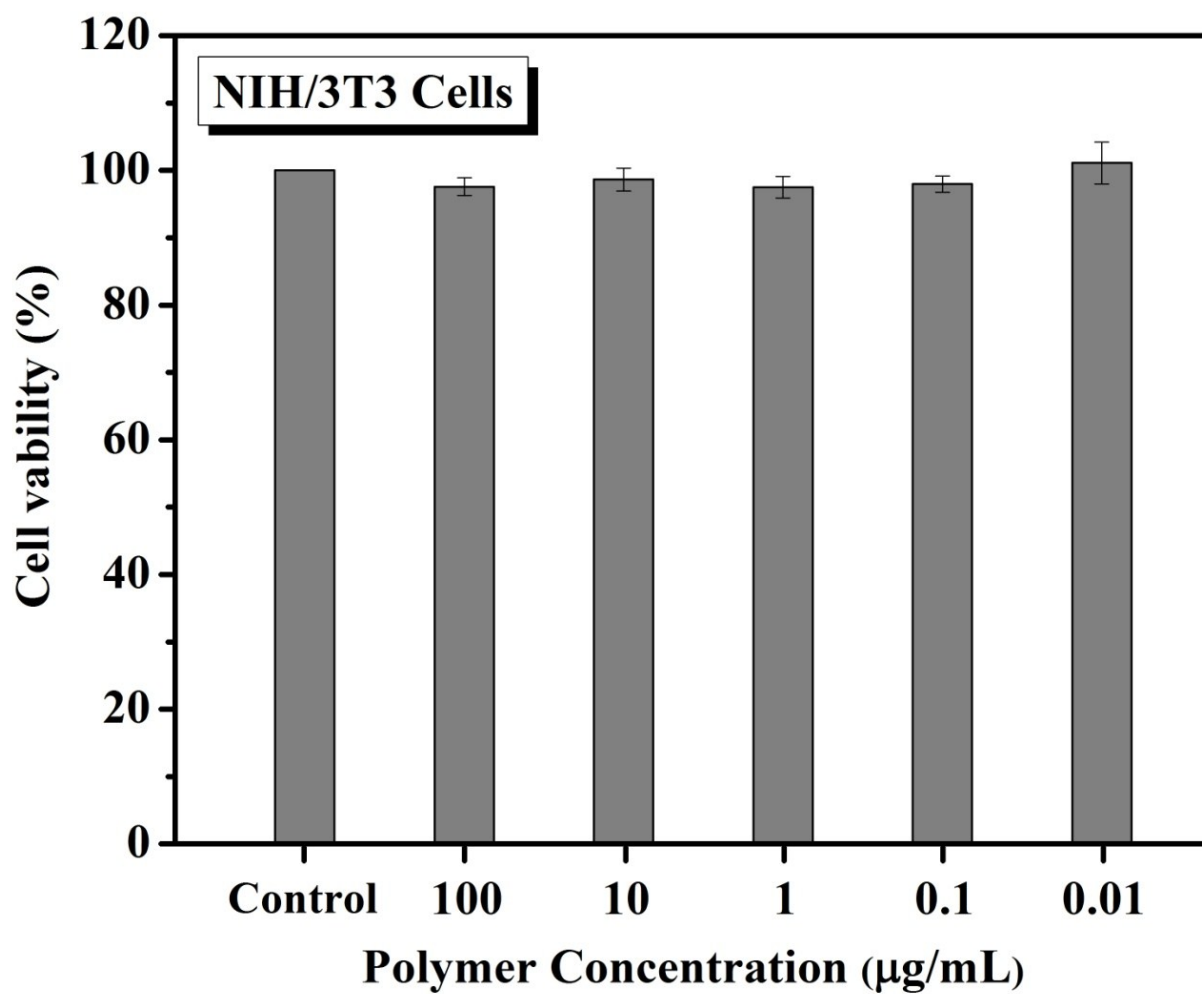

**Fig. S8:** *In vitro* cytotoxicity assay of BDAP-PEG micelles towards NIH/3T3 cells at 24 h.

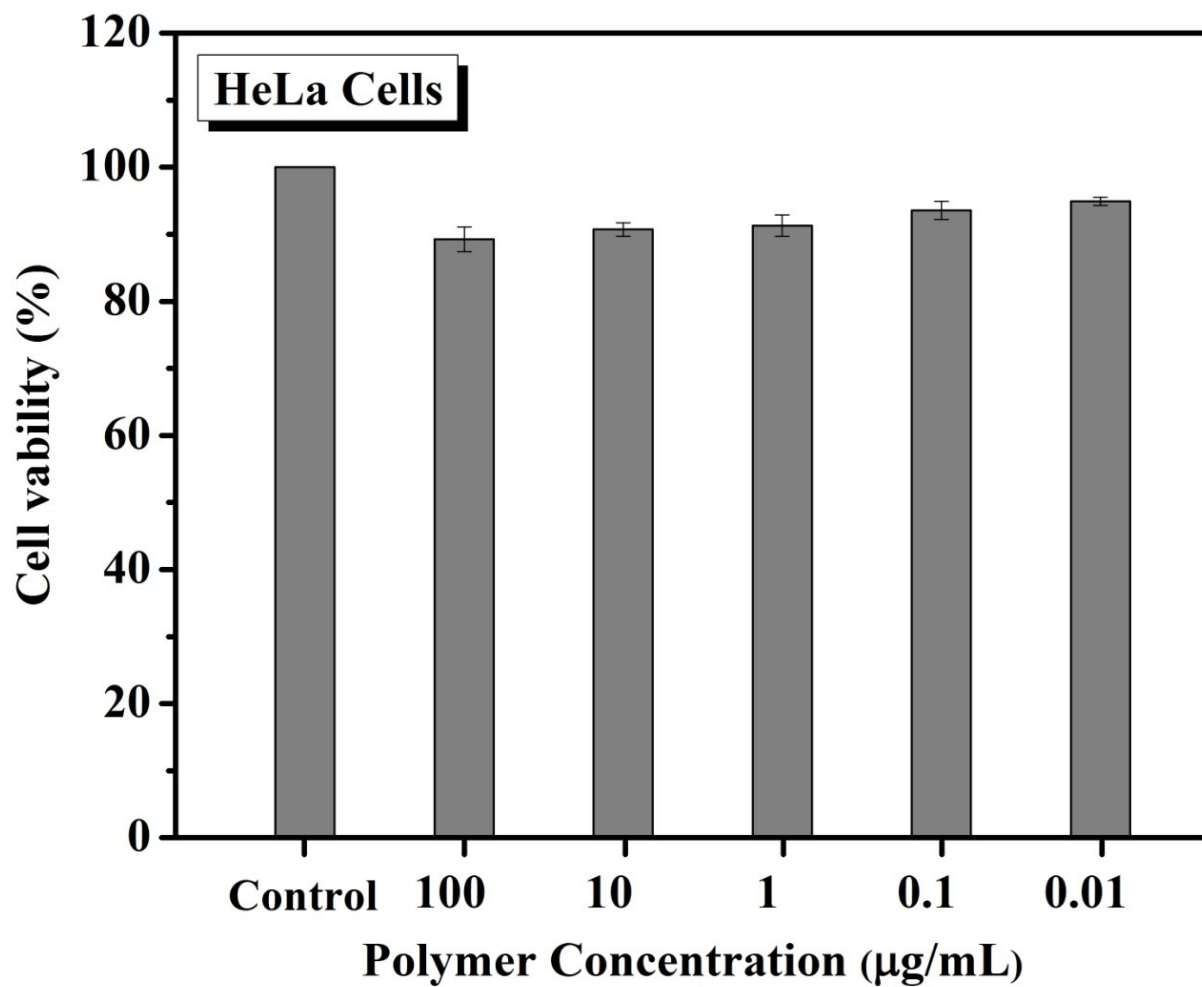

**Fig. S9:** *In vitro* cytotoxicity of BDAP-PEG micelles towards HeLa cells at 24 h.

## BDAP-PEG ( pH 7.4 )

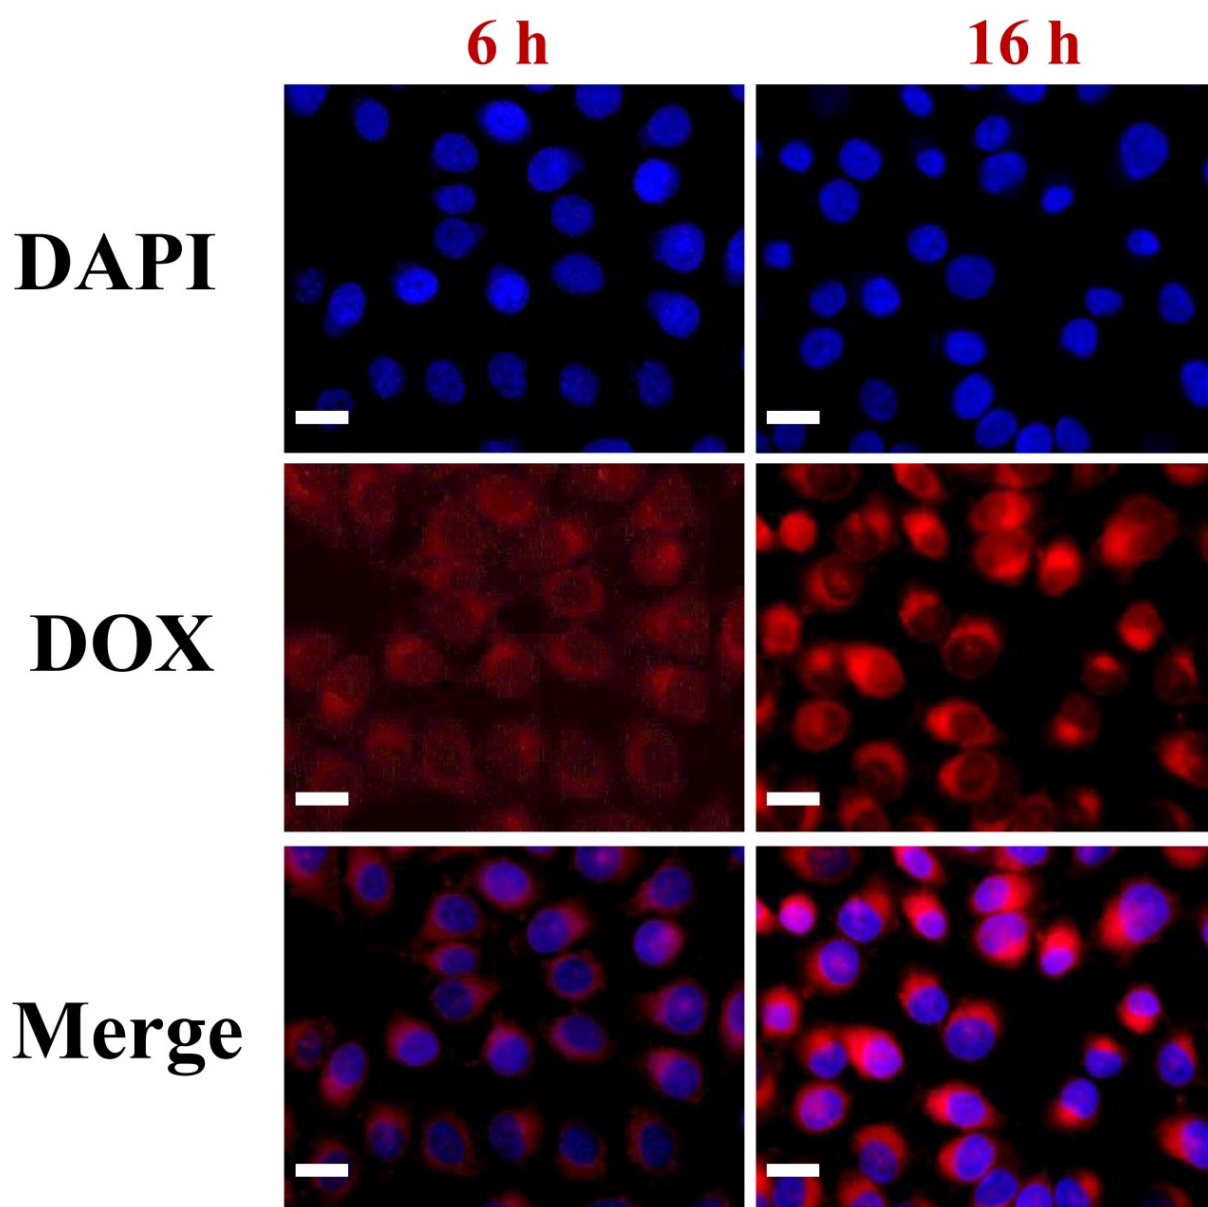

**Fig. S10:** CLSM images of HeLa cells incubated with DOX-loaded BDAP-PEG micelles (DLC =  $17.60 \pm 1.5\%$ ) for 6 h or 16 h at pH 7.4 and 37 °C. Micrographs of DOX-loaded micelles stained with the nuclear stain DAPI (top panel; blue), characteristic DOX fluorescence (middle panel; red) and merged images (lower panel). Scale bars are 20  $\mu\text{m}$  for all images.

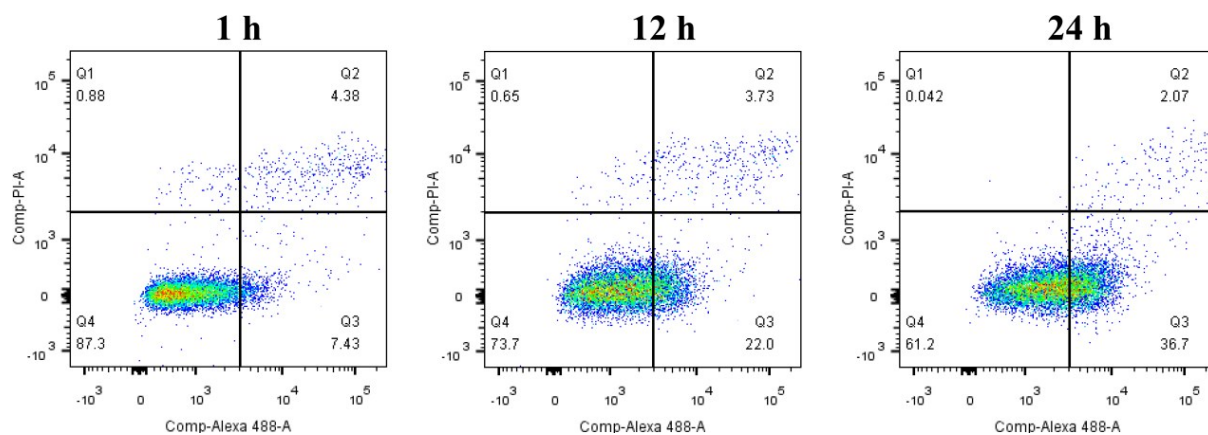

**Fig. S11:** Quantification of apoptosis by Annexin-V/PI double staining and flow cytometry. Dot plot diagrams of HeLa cells incubated with DOX-loaded BDAP-PEG (DLC =  $17.60 \pm 1.5\%$ ) for 1, 12 or 24 h at pH 6.5 and 37 °C.

In order to provide more detailed material properties, CMC and DLS measurements were employed to characterize the self-assembly behavior of difunctional hexyl-terminated PEG (BC6-PEG, Fig. S12) in water. Fig. S13 shows that aqueous BC6-PEG solution with a broad range of concentrations between 1 and  $10^{-5}$  mg/mL did not exhibit a CMC transition. However, BDAP-PEG exhibited a clear CMC at 0.005 mg/mL, suggesting that the DAP moieties within BDAP-PEG significantly affected the amphiphilicity and molecular motion of the PEG backbone in water. DLS revealed that BC6-PEG did not exhibit micellar aggregates, whereas BDAP-PEG exhibited a mean hydrodynamic diameter of  $53 \pm 15$  nm (Fig. S14), indicating introduction of DAP groups into the PEG chain ends facilitated the formation of nanosized micelles.

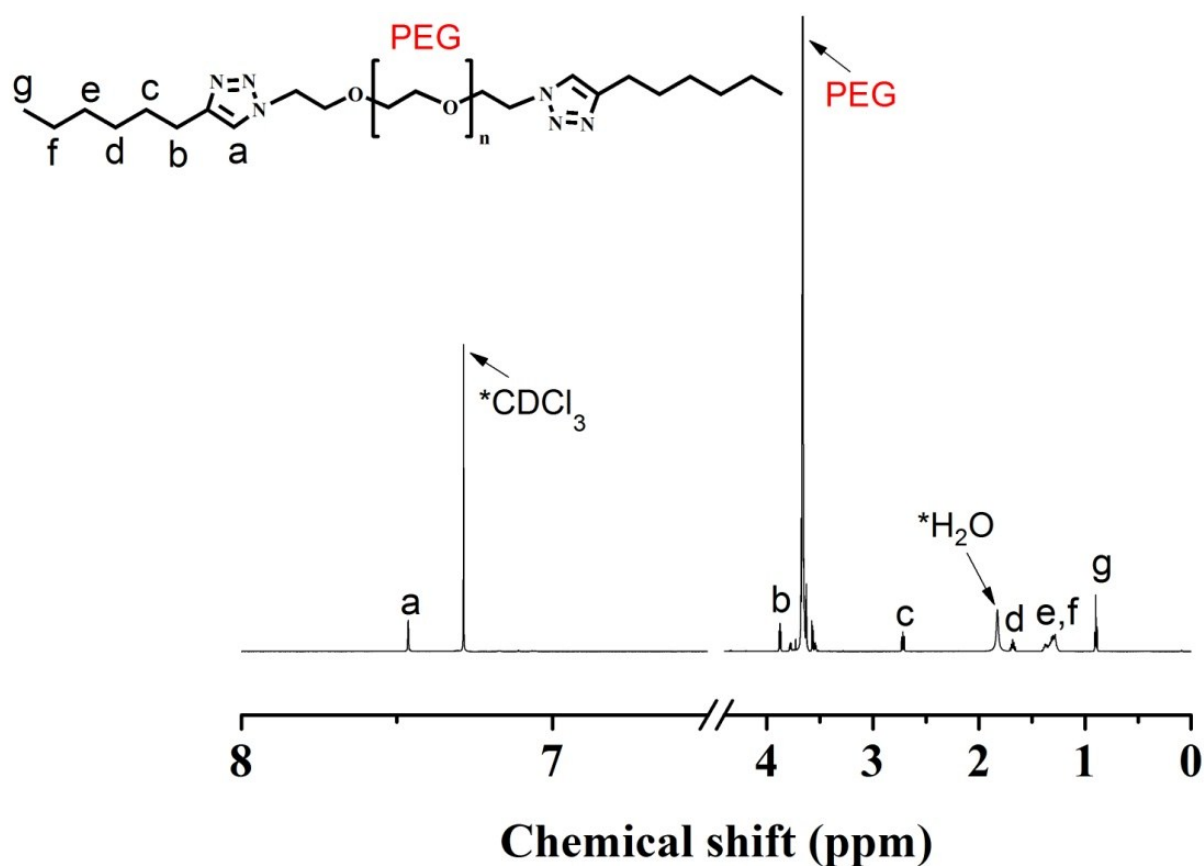

**Figure S12:** <sup>1</sup>H NMR spectrum of BC6-PEG in CDCl<sub>3</sub>.

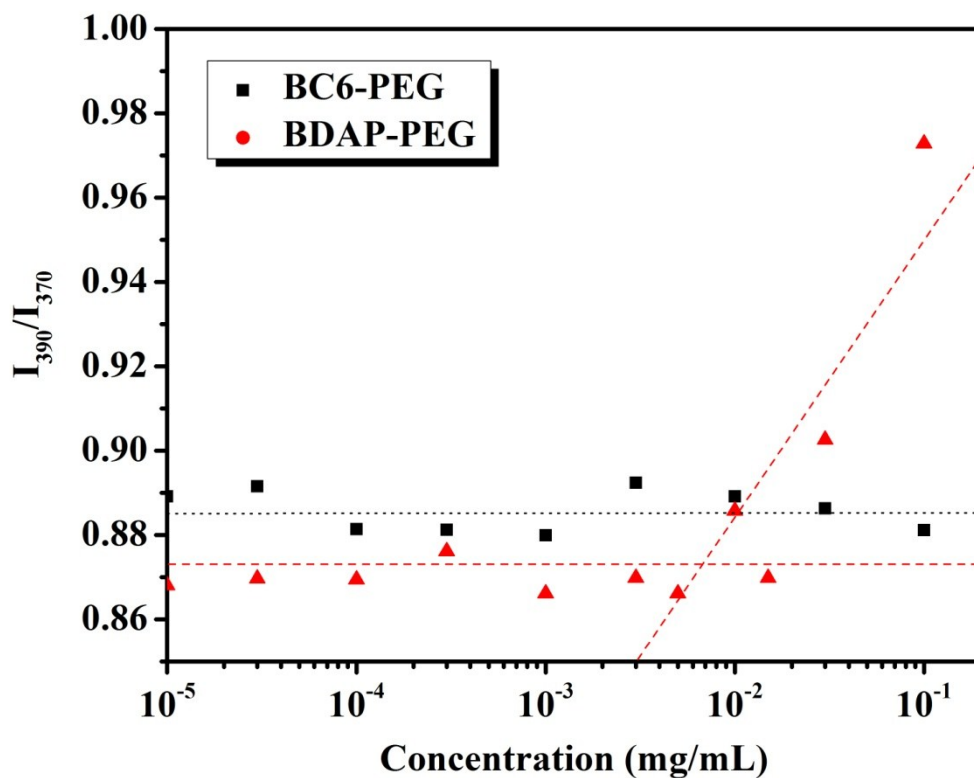

Figure S13: CMC determination for BC6-PEG and BDAP-PEG.

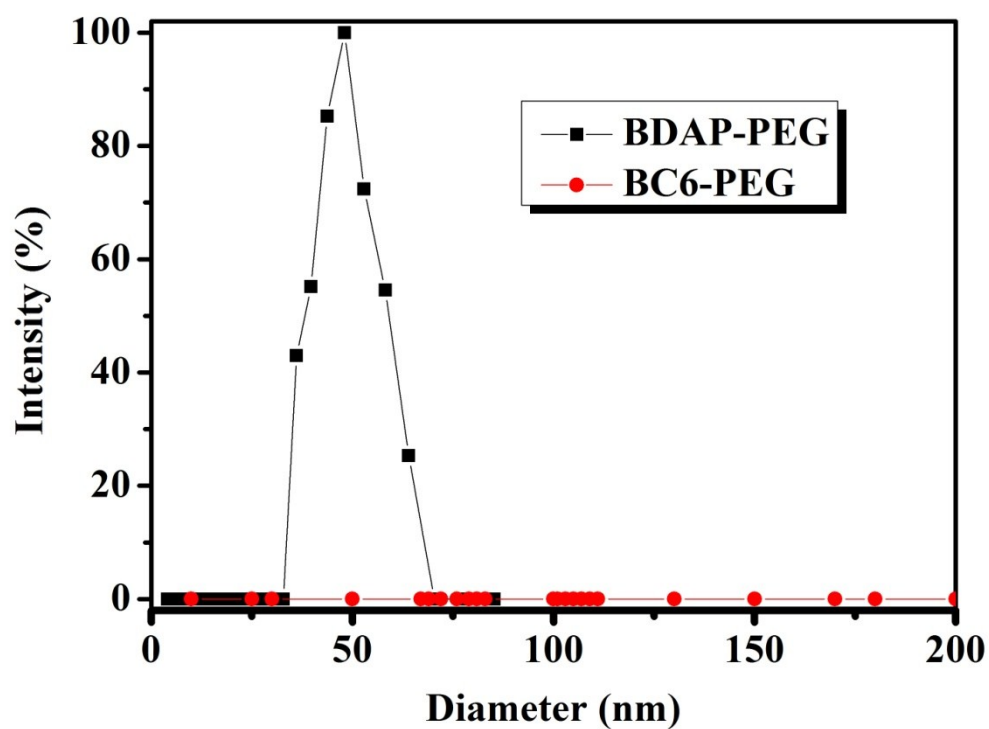

Figure S14: DLS analyses of 1.0 mg/mL solutions of BC6-PEG and BDAP-PEG in aqueous solution.
